# Supplementary material
Source: publisher figshare collection journal article supplement (https://sage.figshare.com/ndownloader/files/23581480)
Supplement: Supplementary file 1 [file 23581480]

## Appendix

### Variable Coding

#### **Socio-demographics:**

*Age* - Respondent's age at the time of the 2018 election survey.

*Gender* - 0 = male respondent, 1 = female respondent.

*Education* - 1 = did not graduate from high school, 2 = high school graduate, 3 = some college, but no degree (yet), 4 = 2 year college degree, 5 = 4 year college degree, 6 = postgraduate degree.

*Income* – Respondent selected a basic income category from 1 – 16. Examples: 3 = \$20,000 - \$29,000; 5 = \$40,000 - \$49,000; 8 = \$70,000 - \$79,999; 11 = \$120,000 - \$149,999

*Race* – 0 = other race, 1 = white.

*Sexually Harassed* – 0 = never been sexually harassed, 1 = have been sexually harassed.

#### **Political Attitudes:**

*Party ID* – nominal level variable with Democrats, Republicans, and Independents.

*Political Ideology* - The respondent is asked to self-place their ideology on a 0 (left) to 6 (right) scale. The variable was recoded to be from 0 very conservative to 6 very liberal.

*Political Interest* – The respondent was asked how frequently they pay attention to the news. 0 = hardly at all, 1 = only now and then, 2 = some of the time, 3 = most of the time.

*Kavanaugh Feeling* – feeling thermometer, 0 = most negative feeling, 100 = most positive feeling.

*Attitude regarding sexual harassment response* – 0 = appropriate response, 1 = gone too far.

*Participatory Acts* - 0 = did not participate, 1 = participated.

*Vote Choice* - 0 = voted for Republican candidate, 1 = voted for Democratic candidate.

## **Survey Question Wording: 2018 ANES Pilot Study**

### Attitude regarding sexual harassment response

-Now, thinking about the increasing attention to sexual harassment in the workplace, which statement best describes what you think?

1 = "It has gone too far and is calling into question all interactions between men and women in the workplace, which will hurt people's ability to do their jobs." Or:

2 = "It is an appropriate response to a problem that has been ignored for too long and addressing it will help women in the workplace."

### Sexually harassed

-Have you ever personally experienced sexual harassment at work, or not?

1 = Have

2= Have not

### Brett Kavanaugh Feeling

-How would you rate Supreme Court Justice Brett Kavanaugh?

0=very cold or unfavorable; 15=quite cold or unfavorable feeling; 30=Fairly cold or unfavorable feeling; 40=More cold or unfavorable than warm; 50=No feeling at all;

60=A bit more warm or favorable feeling than cold; 70=Fairly warm or favorable feeling;

85=Quite warm or favorable feeling; 100=Very warm or favorable feeling.

## Descriptive Statistics

Table A1: Descriptive Statistics – Demographics

| <b>Variable</b> | <b>Min</b> | <b>Median</b> | <b>Mean</b> | <b>Max</b> | <b>SD</b> |
|-----------------|------------|---------------|-------------|------------|-----------|
| Education       | 1          | 3             | 3.59        | 6          | 1.54      |
| Age             | 18         | 52            | 49.48       | 91         | 17.05     |
| Income          | 1          | 5             | 6.07        | 16         | 3.52      |
| <b>Variable</b> | <b>0</b>   | <b>1</b>      |             |            |           |
| Gender          | 44.04%     | 55.96%        |             |            |           |
| Race            | 25.84%     | 74.16%        |             |            |           |

Table A2: Descriptive Statistics – Political Attitudes

| <b>Variable</b>    | <b>Min</b> | <b>Median</b> | <b>Mean</b> | <b>Max</b> | <b>SD</b> |
|--------------------|------------|---------------|-------------|------------|-----------|
| Political Ideology | 0          | 3             | 3.08        | 6          | 1.92      |
| Political Interest | 0          | 3             | 2.28        | 3          | 0.96      |
| Kavanaugh Feeling  | 0          | 41            | 44.07       | 100        | 37.29     |

Table A3: Descriptive Statistics – Participatory Acts and Vote Choice

| <b>Variable</b>         | <b>0</b> | <b>1</b> |
|-------------------------|----------|----------|
| Protest                 | 87.74%   | 12.26%   |
| Donated                 | 76.48%   | 23.52%   |
| Voted                   | 22.8%    | 77.2%    |
| Voted Democrat – House  | 41.97%   | 58.03%   |
| Voted Democrat – Senate | 40.83%   | 59.17%   |

Table A4: Descriptive Statistics Sexual Harassment Experience, Attitudes Toward Current Attention, and Feeling Towards Kavanaugh

|                                                | <b>Full<br/>Sample</b> | <b>Women</b> | <b>Men</b>   |
|------------------------------------------------|------------------------|--------------|--------------|
| Experienced Sexual Harassment?                 |                        |              |              |
| Yes                                            | 28.5%                  | 39.1%        | 17.3%*       |
| No                                             | 71.5%                  | 60.1%        | 82.6%        |
| Current Attention to Sexual Harassment         |                        |              |              |
| Appropriate                                    | 49.2%                  | 53.5%        | 44.6%        |
| Gone Too Far                                   | 50.8%                  | 46.4%        | 55.3%*       |
| Feeling Toward Brett Kavanaugh (0-100)? (Mean) | 44.1 (37.2)            | 40 (36.1)    | 48.8* (38.2) |
|                                                | <b>Dem.</b>            | <b>Ind.</b>  | <b>Rep.</b>  |
| Experienced Sexual Harassment?                 |                        |              |              |
| Yes                                            | 30.6%                  | 26.7%        | 29.7%        |
| No                                             | 69.4%                  | 73.3%        | 70.2%        |
| Current Attention to Sexual Harassment         |                        |              |              |
| Appropriate                                    | 68.1%                  | 51.2%        | 28.7%        |
| Gone Too Far                                   | 31.9%                  | 48.8%        | 71.32%       |
| Feeling Toward Brett Kavanaugh (0-100)? (Mean) | 18.9 (23.4)            | 44.6* (34)   | 78.9*(27.7)  |

Note: Descriptive statistics calculated with survey weights applied.

\* indicates a statistically significant difference at  $p < 0.05$ ; bivariate models estimated through logit or ordered logit.

Table A5: Predicting Feeling Toward Brett Kavanaugh

|                                       | Democrat |         |        | Independent |         |         | Republican |         |         |
|---------------------------------------|----------|---------|--------|-------------|---------|---------|------------|---------|---------|
|                                       | Full     | Women   | Men    | Full        | Women   | Men     | Full       | Women   | Men     |
| (Intercept)                           | 48.97*   | 54.58*  | 40.18* | 31.71*      | 43.46*  | 32.78   | 43.90*     | 38.74*  | 45.39*  |
|                                       | (6.35)   | (6.26)  | (9.76) | (13.33)     | (11.86) | (18.80) | (7.67)     | (9.60)  | (10.96) |
| Education                             | -0.47    | -0.50   | -0.57  | -2.68       | -2.53   | -3.48   | -0.50      | -1.20   | 0.11    |
|                                       | (0.77)   | (0.85)  | (1.27) | (1.48)      | (2.05)  | (1.99)  | (0.67)     | (1.11)  | (0.87)  |
| Sex                                   | -1.95    |         |        | 2.34        |         |         | -2.65      |         |         |
|                                       | (2.21)   |         |        | (4.41)      |         |         | (2.10)     |         |         |
| Age                                   | -0.05    | -0.12   | 0.06   | 0.22        | 0.32*   | 0.10    | 0.36*      | 0.35*   | 0.38*   |
|                                       | (0.06)   | (0.07)  | (0.09) | (0.14)      | (0.15)  | (0.24)  | (0.07)     | (0.11)  | (0.09)  |
| White                                 | -0.75    | -4.13   | 3.21   | 0.61        | -1.40   | 0.19    | 5.74       | 4.66    | 7.05    |
|                                       | (2.17)   | (2.48)  | (3.49) | (4.00)      | (4.51)  | (6.63)  | (3.89)     | (5.68)  | (5.37)  |
| Income                                | -0.43    | -0.44   | -0.31  | 1.20        | 1.14    | 0.91    | 0.49       | 0.83    | 0.17    |
|                                       | (0.31)   | (0.35)  | (0.45) | (0.62)      | (0.90)  | (0.74)  | (0.29)     | (0.51)  | (0.35)  |
| Political Ideology                    | -5.04*   | -5.28*  | -4.52* | -3.39       | -4.45*  | -3.78   | -4.43*     | -4.44*  | -4.22*  |
|                                       | (0.85)   | (1.00)  | (1.39) | (2.13)      | (2.17)  | (2.99)  | (0.93)     | (1.32)  | (1.29)  |
| Political Interest                    | 0.10     | 0.10    | -0.59  | 2.40        | 0.03    | 4.84    | 4.12*      | 6.02*   | 2.26    |
|                                       | (1.81)   | (2.04)  | (2.86) | (1.94)      | (2.23)  | (3.03)  | (1.42)     | (1.99)  | (1.95)  |
| Sexually Harassed                     | -1.29    | -3.22   | 4.10   | -1.97       | -7.50   | 9.81    | -1.43      | -0.97   | -2.36   |
|                                       | (1.98)   | (2.12)  | (4.13) | (4.83)      | (5.12)  | (8.73)  | (2.08)     | (2.83)  | (2.97)  |
| Sex harassment attention gone too far | 5.54*    | 5.45    | 4.73   | 11.07*      | 4.83    | 16.99*  | 9.35*      | 8.82*   | 10.43*  |
|                                       | (2.62)   | (3.32)  | (4.01) | (4.19)      | (4.63)  | (6.71)  | (2.92)     | (3.56)  | (4.63)  |
| N                                     | 991      | 595     | 396    | 329         | 179     | 150     | 706        | 337     | 369     |
| AIC                                   | 9231     | 5432.8  | 3769.9 | 3208.4      | 1709.9  | 1495.3  | 6514.0     | 3161.2  | 3358.6  |
| BIC                                   | 9426.9   | 5590.8  | 3913.2 | 3360.3      | 1824.7  | 1603.8  | 6696.4     | 3298.8  | 3499.3  |
| Log Likelihood                        | -4575.5  | -2680.4 | -1849  | -1564.2     | -819    | -711.8  | -3217      | -1544.7 | -1643   |

Standard errors in parentheses; \* indicates statistical significance at  $p < 0.05$ ; survey weights utilized

## Mediation Analysis

Table A6: Medication Analysis Results

|                                  | House Vote                  |                                          | Senate Vote                 |                                          |
|----------------------------------|-----------------------------|------------------------------------------|-----------------------------|------------------------------------------|
|                                  | Gender/Kavanaugh<br>Feeling | Gender/Sex<br>Harassment<br>Gone Too Far | Gender/Kavanaugh<br>Feeling | Gender/Sex<br>Harassment<br>Gone Too Far |
| ACME (Control)                   | 0.01*<br>(0.00,0.02)        | 0.00*<br>(0.00, 0.01)                    | 0.01*<br>(0.00, 0.02)       | 0.00*<br>(0.00, 0.01)                    |
| ACME (Treated)                   | 0.01*<br>(0.00, 0.01)       | 0.00*<br>(0.00, 0.01)                    | 0.01*<br>(0.00, 0.02)       | 0.00*<br>(0.00, 0.01)                    |
| ADE (Control)                    | 0.02<br>(-0.00,0.05)        | 0.02<br>(-0.00, 0.04)                    | 0.02<br>(-0.02, 0.05)       | 0.02<br>(-0.02, 0.05)                    |
| ADE (Treated)                    | 0.02<br>(-0.00, 0.05)       | 0.02<br>(-0.00, 0.04)                    | 0.02<br>(-0.02, 0.05)       | 0.02<br>(-0.02, 0.05)                    |
| TotalEffect                      | 0.03*<br>(0.00, 0.06)       | 0.02<br>(-0.00, 0.05)                    | 0.03<br>(-0.01, 0.07)       | 0.02<br>(-0.02, 0.05)                    |
| Proportion Mediated<br>(Control) | 0.26*<br>(0.04, 1.22)       | 0.10<br>(-0.31, 0.78)                    | 0.37<br>(-2.04, 3.42)       | 0.11<br>(-1.28, 1.59)                    |
| Proportion Mediated<br>(Treated) | 0.26*<br>(0.04, 1.22)       | 0.10<br>(-0.31, 0.78)                    | 0.37<br>(-2.05,3.44)        | 0.11<br>(-1.28, 0.159)                   |
| ACME (Average)                   | 0.01*<br>(0.00, 0.01)       | 0.00*<br>(0.00, 0.01)                    | 0.00*<br>(0.00, 0.02)       | 0.00*<br>(0.00, 0.01)                    |
| ADE (Average)                    | 0.02<br>(-0.00, 0.5)        | 0.02<br>(-0.00, 0.04)                    | 0.02<br>(-0.02, 0.05)       | 0.02<br>(-0.02, 0.05)                    |
| Proportion Mediated<br>(Average) | 0.26*<br>(0.04, 0.05)       | 0.10<br>(-0.31, 0.78)                    | 0.37<br>(-2.05, 3.43)       | 0.11<br>(-1.28, 1.59)                    |
| N                                | 1,475                       | 1,475                                    | 1,122                       | 1,122                                    |

10,000 simulations; ACME = Average Causal Mediation Effects; ADE = Average Direct Effects; 95% confidence intervals in parentheses.
